# Supplementary material for: Facile synthesis of NASICON-type Li1.3Al0.3Ti1.7(PO4)3 solid electrolyte and its application for enhanced cyclic performance in lithium ion batteries through the introduction of an artificial Li3PO4 SEI layer
Source: Royal Society of Chemistry journal article supplement (doi:10.1039/c7ra09335g), 2017-01-01
Supplement: c7ra09335g1.pdf [file c7ra09335g1.pdf]

## Supporting Information

Facile synthesis of NASICON-type  $\text{Li}_{1.3}\text{Al}_{0.3}\text{Ti}_{1.7}(\text{PO}_4)_3$  solid electrolyte and its application for enhanced cyclic performance in lithium ion batteries through the introduction of an artificial  $\text{Li}_3\text{PO}_4$  SEI layer

Jianguo Liu<sup>a,b</sup>, Tao Liu<sup>a,b</sup>, Yujie Pu<sup>a,b</sup>, Mingming Guan<sup>a</sup>, Zhiyuan Tang<sup>a,b,\*</sup>, Fei Ding<sup>c,\*\*</sup>, Zhibin Xu<sup>c</sup>,

Yang Li<sup>c</sup>

<sup>a</sup> School of Chemical and Engineering, Tianjin University, Tianjin, 300072, PR China

<sup>b</sup> Department of Applied Chemistry, School of Chemical Engineering and Technology, Tianjin University, Tianjin 300072, PR China

<sup>c</sup> National Key Lab of Power Sources, Tianjin Institute of Power Sources, Tianjin 300384, PR China

\* Corresponding author.

\*\* Corresponding author.

E-mail address: tangzhiyuantju@163.com (Z. Tang)    hildingfei@163.com (F. Ding)

**Table S1** The density of LATP pellets with different content of molten  $\text{CO}(\text{NH}_2)_2$

| D                             | 1/0  | 1/1  | 1/2  | 1/3  |
|-------------------------------|------|------|------|------|
| Density( $\text{g cm}^{-3}$ ) | 2.75 | 2.74 | 2.84 | 2.79 |
| Relative density (%)          | 94.2 | 93.8 | 97.3 | 95.5 |

**Table S2** The density of LATP pellets for the LATP powders calcined at different temperatures

|                              |      |      |      |      |
|------------------------------|------|------|------|------|
| Temperature(°C)              | 600  | 700  | 800  | 900  |
| Density(g cm <sup>-3</sup> ) | 2.72 | 2.84 | 2.68 | 2.54 |
| Relative density (%)         | 93.1 | 97.3 | 91.8 | 87.0 |

**Table S3** The density of LATP pellets for the LATP pellets sintered at various temperatures

|                              |      |      |      |      |
|------------------------------|------|------|------|------|
| Temperature(°C)              | 750  | 800  | 850  | 900  |
| Density(g cm <sup>-3</sup> ) | 2.56 | 2.84 | 2.71 | 2.60 |
| Relative density (%)         | 87.7 | 97.3 | 92.8 | 89.0 |

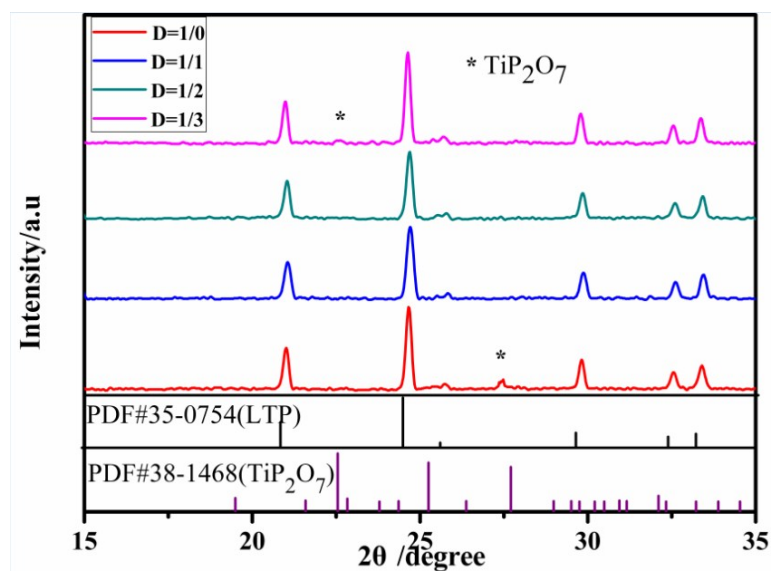

**Fig. S1** XRD patterns of the LTP powders with different content of molten  $\text{CO}(\text{NH}_2)_2$

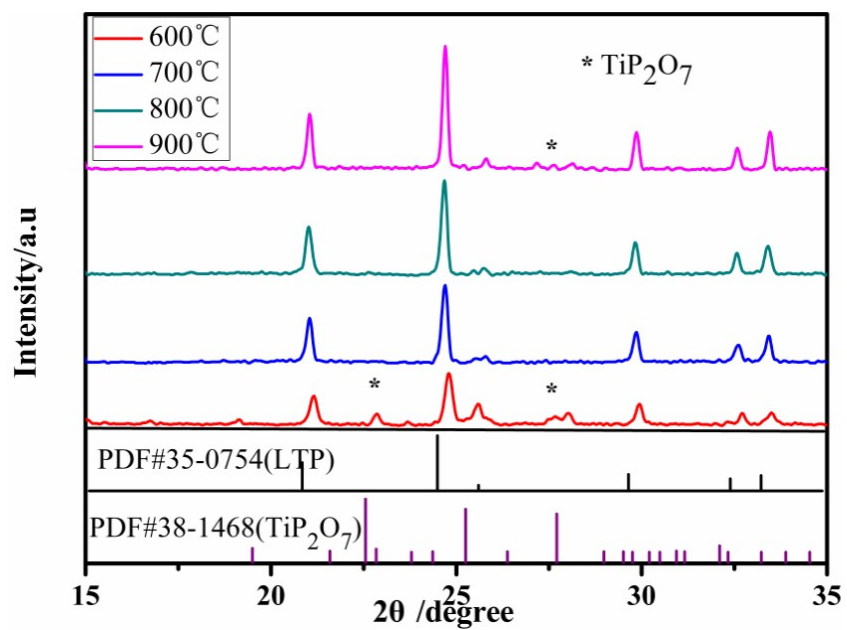

Fig. S2 XRD patterns for the LATP powders calcined at different temperatures

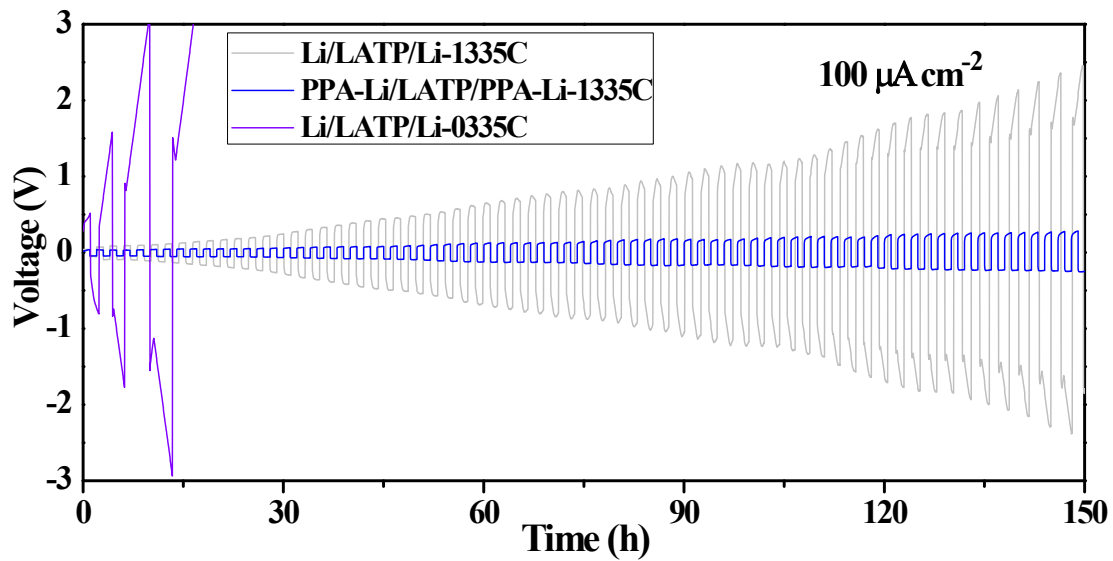

Fig. S3 cyclability of the symmetric cells for 150 h with a current of  $100 \mu\text{A cm}^{-2}$  at room temperature

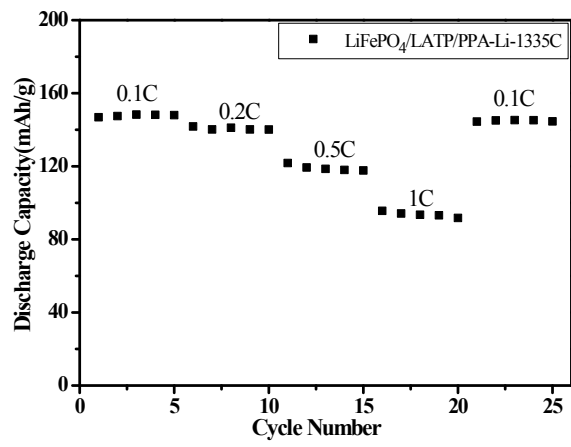

**Fig. S4** Rate performance of  $\text{LiFePO}_4/\text{LATP}/\text{PPA-Li-1335C}$  cell at room temperature
